# Supplementary material for: Messages to Motivate Human Papillomavirus Vaccination: National Studies of Parents and Physicians
Source: Oxford University Press journal article supplement (doi:10.1158/1055-9965.epi-16-0224), 2016-09-30
Supplement: 10559965epi160224-sup-163623_1_supp_3539502_68q4x1.docx [file 10559965epi160224-sup-163623_1_supp_3539502_68q4x1.docx]

**Supplementary Table S3.** Correlates of parents’ favorable perceptions of messages intended to encourage HPV vaccine uptake, adjusted for child’s vaccination status and parent income.

|  | **Message** | | | | | | | | | |
| --- | --- | --- | --- | --- | --- | --- | --- | --- | --- | --- |
| **Characteristic** | **B1** | | **B2** | | **L1** | | **L2** | | **L3** | |
| **OR** | **(95% CI)** | **OR** | **(95% CI)** | **OR** | **(95% CI)** | **OR** | **(95% CI)** | **OR** | **(95% CI)** |
| Panel A (*n* = 515) |  |  |  |  |  |  |  |  |  |  |
| Parent race/ethnicity |  |  |  |  |  |  |  |  |  |  |
| White, non-Hispanic | 1 |  | 1 |  | 1 |  | 1 |  | 1 |  |
| Black, non-Hispanic | 1.07 | (0.51-2.22) | 1.09 | (0.56-2.11) | 0.92 | (0.48-1.77) | 0.86 | (0.44-1.66) | 1.45 | (0.74-2.84) |
| Other, non-Hispanic | 1.30 | (0.53-3.15) | 1.75 | (0.78-3.92) | 0.95 | (0.41-2.19) | 0.74 | (0.32-1.74) | 0.91 | (0.39-2.08) |
| Hispanic | 1.14 | (0.65-1.99) | 1.18 | (0.71-1.97) | 1.32 | (0.78-2.22) | 1.06 | (0.62-1.81) | 1.27 | (0.76-2.15) |
| Parent education level |  |  |  |  |  |  |  |  |  |  |
| Less than high school | 1 |  | 1 |  | 1 |  | 1 |  | 1 |  |
| High school | 1.42 | (0.59-3.41) | 0.93 | (0.44-1.99) | 0.49 | (0.22-1.08) | 0.77 | (0.35-1.71) | 0.62 | (0.28-1.37) |
| Some college | 0.85 | (0.34-2.15) | 0.76 | (0.35-1.69) | 0.55 | (0.24-1.24) | 0.63 | (0.28-1.43) | 0.49 | (0.22-1.10) |
| Bachelor’s degree or higher | 0.88 | (0.34-2.27) | 0.91 | (0.40-2.06) | 0.60 | (0.26-1.40) | 0.86 | (0.36-2.02) | 0.63 | (0.27-1.46) |
| Child’s age |  |  |  |  |  |  |  |  |  |  |
| 11-12 | 1 |  | 1 |  | 1 |  | 1 |  | 1 |  |
| 13-14 | 0.67 | (0.39-1.16) | 0.77 | (0.47-1.26) | 0.67 | (0.41-1.10) | 0.89 | (0.54-1.47) | 0.99 | (0.61-1.61) |
| 15-17 | 0.62 | (0.37-1.05) | 0.62 | (0.39-0.995)* | 0.81 | (0.51-1.29) | 0.74 | (0.46-1.19) | 0.98 | (0.62-1.55) |
| Child’s sex |  |  |  |  |  |  |  |  |  |  |
| Male | 1 |  | 1 |  | 1 |  | 1 |  | 1 |  |
| Female | 0.84 | (0.55-1.26) | 0.68 | (0.47-0.99)* | 0.70 | (0.48-1.01) | 1.17 | (0.81-1.71) | 0.71 | (0.49-1.02) |
| HPV vaccine importance |  |  |  |  |  |  |  |  |  |  |
| Very/extremely important | 1 |  | 1 |  | 1 |  | 1 |  | 1 |  |
| Not/slightly/moderately  important | 0.35 | (0.21-0.56)** | 0.31 | (0.20-0.49)** | 0.26 | (0.16-0.40)** | 0.19 | (0.12-0.32)** | 0.18 | (0.11-0.28)** |

|  | **B3** | | **B4** | | **L4** | | **L5** | | **L6** | |
| --- | --- | --- | --- | --- | --- | --- | --- | --- | --- | --- |
| **OR** | **(95% CI)** | **OR** | **(95% CI)** | **OR** | **(95% CI)** | **OR** | **(95% CI)** | **OR** | **(95% CI)** |
| Panel B (*n* = 483) |  |  |  |  |  |  |  |  |  |  |
| Parent race/ethnicity |  |  |  |  |  |  |  |  |  |  |
| White, non-Hispanic | 1 |  | 1 |  | 1 |  | 1 |  | 1 |  |
| Black, non-Hispanic | 1.03 | (0.54-1.97) | 1.16 | (0.61-2.22) | 1.23 | (0.65-2.33) | 0.80 | (0.42-1.52) | 1.68 | (0.81-3.50) |
| Other, non-Hispanic | 1.26 | (0.64-2.50) | 0.82 | (0.42-1.59) | 0.91 | (0.46-1.80) | 0.85 | (0.44-1.65) | 0.93 | (0.46-1.87) |
| Hispanic | 0.87 | (0.47-1.60) | 1.64 | (0.87-3.08) | 0.71 | (0.37-1.34) | 0.73 | (0.40-1.33) | 1.34 | (0.70-2.56) |
| Parent education level |  |  |  |  |  |  |  |  |  |  |
| Less than high school | 1 |  | 1 |  | 1 |  | 1 |  | 1 |  |
| High school | 1.17 | (0.51-2.69) | 1.72 | (0.76-3.88) | 1.52 | (0.67-3.45) | 0.81 | (0.35-1.85) | 0.84 | (0.34-2.07) |
| Some college | 1.36 | (0.58-3.21) | 1.74 | (0.75-4.04) | 1.29 | (0.55-3.01) | 1.32 | (0.55-3.13) | 0.79 | (0.31-1.99) |
| Bachelor’s degree or higher | 1.05 | (0.44-2.49) | 1.50 | (0.64-3.52) | 1.23 | (0.52-2.93) | 1.19 | (0.50-2.87) | 0.94 | (0.36-2.42) |
| Child’s age |  |  |  |  |  |  |  |  |  |  |
| 11-12 | 1 |  | 1 |  | 1 |  | 1 |  | 1 |  |
| 13-14 | 0.74 | (0.46-1.20) | 0.73 | (0.45-1.19) | 0.58 | (0.35-0.96)* | 0.66 | (0.41-1.08) | 0.70 | (0.42-1.16) |
| 15-17 | 1.06 | (0.68-1.67) | 0.89 | (0.56-1.40) | 0.71 | (0.45-1.12) | 0.77 | (0.49-1.22) | 0.85 | (0.53-1.38) |
| Child’s sex |  |  |  |  |  |  |  |  |  |  |
| Male | 1 |  | 1 |  | 1 |  | 1 |  | 1 |  |
| Female | 1.66 | (1.14-2.44)** | 0.85 | (0.58-1.25) | 1.07 | (0.73-1.56) | 0.72 | (0.49-1.05) | 0.94 | (0.63-1.40) |
| HPV vaccine importance |  |  |  |  |  |  |  |  |  |  |
| Very/extremely important | 1 |  | 1 |  | 1 |  | 1 |  | 1 |  |
| Not/slightly/moderately  important | 0.26 | (0.17-0.42)** | 0.31 | (0.20-0.49)** | 0.38 | (0.25-0.59)** | 0.33 | (0.21-0.53)** | 0.16 | (0.09-0.28)** |

|  | **B5** | | **B6** | | **L7** | | **L8** | | **L9** | |
| --- | --- | --- | --- | --- | --- | --- | --- | --- | --- | --- |
| **OR** | **(95% CI)** | **OR** | **(95% CI)** | **OR** | **(95% CI)** | **OR** | **(95% CI)** | **OR** | **(95% CI)** |
| Panel C (*n* = 506) |  |  |  |  |  |  |  |  |  |  |
| Parent race/ethnicity |  |  |  |  |  |  |  |  |  |  |
| White, non-Hispanic | 1 |  | 1 |  | 1 |  | 1 |  | 1 |  |
| Black, non-Hispanic | 2.70 | (1.11-6.58)* | 1.88 | (0.59-5.99) | 2.00 | (0.87-4.61) | 1.38 | (0.61-3.13) | 2.65 | (1.16-6.05)* |
| Other, non-Hispanic | 1.13 | (0.49-2.61) | 1.70 | (0.54-5.39) | 0.57 | (0.26-1.25) | 0.95 | (0.41-2.23) | 0.77 | (0.35-1.69) |
| Hispanic | 1.30 | (0.72-2.32) | 3.56 | (1.68-7.53)** | 0.84 | (0.49-1.44) | 0.76 | (0.43-1.34) | 1.00 | (0.58-1.73) |
| Parent education level |  |  |  |  |  |  |  |  |  |  |
| Less than high school | 1 |  | 1 |  | 1 |  | 1 |  | 1 |  |
| High school | 0.77 | (0.31-1.90) | 0.64 | (0.19-2.17) | 1.39 | (0.64-3.04) | 1.12 | (0.48-2.62) | 0.63 | (0.27-1.50) |
| Some college | 0.98 | (0.38-2.53) | 0.71 | (0.19-2.57) | 1.48 | (0.65-3.39) | 1.42 | (0.58-3.51) | 0.65 | (0.26-1.59) |
| Bachelor’s degree or higher | 0.66 | (0.25-1.71) | 1.14 | (0.32-4.12) | 1.61 | (0.69-3.78) | 1.54 | (0.61-3.88) | 0.64 | (0.26-1.59) |
| Child’s age |  |  |  |  |  |  |  |  |  |  |
| 11-12 | 1 |  | 1 |  | 1 |  | 1 |  | 1 |  |
| 13-14 | 0.97 | (0.57-1.65) | 1.38 | (0.59-3.21) | 1.68 | (1.00-2.82) | 1.78 | (1.02-3.10)* | 1.38 | (0.83-2.31) |
| 15-17 | 0.78 | (0.48-1.26) | 0.87 | (0.38-2.00) | 1.19 | (0.75-1.88) | 0.84 | (0.52-1.36) | 1.21 | (0.76-1.92) |
| Child’s sex |  |  |  |  |  |  |  |  |  |  |
| Male | 1 |  | 1 |  | 1 |  | 1 |  | 1 |  |
| Female | 0.94 | (0.63-1.39) | 0.71 | (0.38-1.33) | 0.79 | (0.54-1.17) | 0.60 | (0.40-0.90)* | 0.58 | (0.40-0.86)** |
| HPV vaccine importance |  |  |  |  |  |  |  |  |  |  |
| Very/extremely important | 1 |  | 1 |  | 1 |  | 1 |  | 1 |  |
| Not/slightly/moderately  important | 0.22 | (0.13-0.36)** | 0.67 | (0.33-1.34) | 0.34 | (0.21-0.55)** | 0.28 | (0.17-0.47)** | 0.26 | (0.16-0.40)** |

* *p* < .05; ** *p* < .01
